# Supplementary material for: Genetic Diversity and Phylogeny of Aedes aegypti, the Main Arbovirus Vector in the Pacific
Source: PubMed Central journal article supplement (PMC4723151; doi:10.1371/journal.pntd.0004374), 2016-01-22
Supplement: pntd.0004374.s001.pdf [file pntd.0004374.s001.pdf]

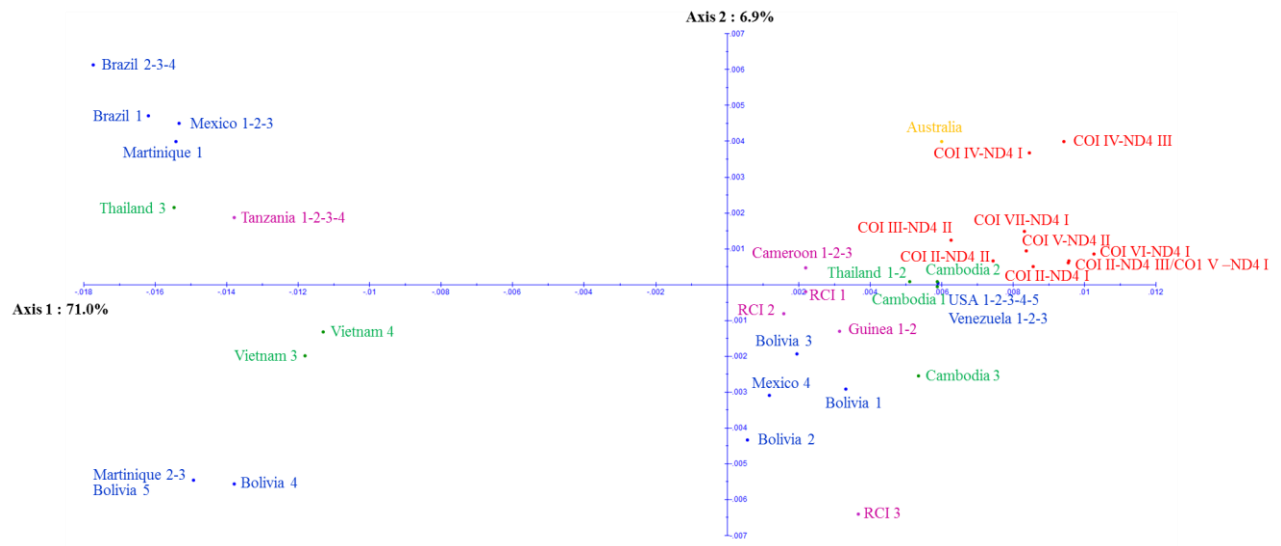

**Figure S1. Factorial Correspondence Analysis of combined CO1-ND4 genes.** The colour indicates the geographical sample origin: blue represents American samples, green Asian samples, purple African samples, yellow Australian samples and red Pacific samples. Both axis represent 77.9% of the variability in the dataset.
