# Supplementary material for: Genetic Diversity and Phylogeny of Aedes aegypti, the Main Arbovirus Vector in the Pacific
Source: PubMed Central journal article supplement (PMC4723151; doi:10.1371/journal.pntd.0004374), 2016-01-22
Supplement: pntd.0004374.s002.pdf [file pntd.0004374.s002.pdf]

**Table S1.** Frequencies of CO1 and ND4 haplotypes for all sample sites and for each island.

| Locality           | N          | CO1         |             |             |             |             |             |             | N          | ND4         |             |             |
|--------------------|------------|-------------|-------------|-------------|-------------|-------------|-------------|-------------|------------|-------------|-------------|-------------|
|                    |            | I           | II          | III         | IV          | V           | VI          | VII         |            | I           | II          | III         |
| Poi-NC             | 30         | -           | 0.50        | -           | 0.50        | -           | -           | -           | 30         | 0.57        | -           | 0.43        |
| Nou-NC             | 30         | 0.20        | 0.23        | -           | 0.57        | -           | -           | -           | 30         | 0.77        | -           | 0.23        |
| Ouv-NC             | 30         | 0.20        | 0.23        | -           | 0.57        | -           | -           | -           | 30         | 0.77        | -           | 0.23        |
| Lau-FJ             | 30         | -           | 0.73        | -           | -           | 0.27        | -           | -           | 30         | 0.37        | -           | 0.63        |
| Suv-FJ             | 30         | -           | 0.37        | -           | -           | 0.53        | -           | 0.1         | 30         | 0.80        | 0.07        | 0.13        |
| Hav-TG             | 30         | 0.37        | -           | 0.63        | -           | -           | -           | -           | 30         | 0.37        | 0.63        | -           |
| Tub-FP             | 30         | 0.77        | -           | 0.23        | -           | -           | -           | -           | 30         | 0.77        | 0.23        | -           |
| Pap-FP             | 30         | 0.60        | -           | 0.20        | -           | -           | 0.20        | -           | 30         | 0.80        | 0.20        | -           |
| Vai-FP             | 30         | 0.10        | 0.1         | 0.80        | -           | -           | -           | -           | 30         | 0.13        | 0.87        | -           |
| <b>All samples</b> | <b>270</b> | <b>0.25</b> | <b>0.24</b> | <b>0.21</b> | <b>0.18</b> | <b>0.09</b> | <b>0.02</b> | <b>0.01</b> | <b>270</b> | <b>0.59</b> | <b>0.22</b> | <b>0.19</b> |

N Number of individual analyzed.

Roman numerals indicate the name of CO1 or ND4 haplotypes.
