# Supplementary material for: Genetic Diversity and Phylogeny of Aedes aegypti, the Main Arbovirus Vector in the Pacific
Source: PubMed Central journal article supplement (PMC4723151; doi:10.1371/journal.pntd.0004374), 2016-01-22
Supplement: pntd.0004374.s003.pdf [file pntd.0004374.s003.pdf]

**Table S2.** MtDNA haplotype sequences for CO1 and ND4 across *Ae. aegypti* Pacific samples.

| <b>Haplotype</b>     | <b>N</b> | <b>Polymorphic positions</b> |     |     |     |     |
|----------------------|----------|------------------------------|-----|-----|-----|-----|
| <b>CO1</b>           |          |                              |     |     |     |     |
|                      |          | 298                          | 442 | 556 | 610 | 703 |
| <b>Haplotype I</b>   | 67       | T                            | T   | G   | G   | A   |
| <b>Haplotype II</b>  | 65       | •                            | •   | •   | •   | T   |
| <b>Haplotype III</b> | 56       | •                            | C   | •   | •   | T   |
| <b>Haplotype IV</b>  | 49       | •                            | •   | •   | A   | T   |
| <b>Haplotype V</b>   | 24       | C                            | •   | •   | •   | T   |
| <b>Haplotype VI</b>  | 6        | •                            | •   | A   | •   | •   |
| <b>Haplotype VII</b> | 3        | C                            | C   | •   | •   | T   |
| <b>ND4</b>           |          |                              |     |     |     |     |
|                      |          | 188                          | 284 |     |     |     |
| <b>Haplotype I</b>   | 160      | G                            | C   |     |     |     |
| <b>Haplotype II</b>  | 60       | •                            | T   |     |     |     |
| <b>Haplotype III</b> | 50       | A                            | •   |     |     |     |

N corresponds to the number of sample belonging to this haplotype.
