# Supplementary material for: Genetic Diversity and Phylogeny of Aedes aegypti, the Main Arbovirus Vector in the Pacific
Source: PubMed Central journal article supplement (PMC4723151; doi:10.1371/journal.pntd.0004374), 2016-01-22
Supplement: pntd.0004374.s004.pdf [file pntd.0004374.s004.pdf]

**Table S3.** MtDNA sequence informations of Pacific samples and reference sequences.

| Geographical Area      | Name                 | Number of specimens         | Country                        | Accession Number | Reference  |          |                            |
|------------------------|----------------------|-----------------------------|--------------------------------|------------------|------------|----------|----------------------------|
| <b>COI</b>             |                      |                             |                                |                  |            |          |                            |
| <b>Pacific</b>         | Haplotype I          | 12                          | New Caledonia                  | KT313642         | This study |          |                            |
|                        |                      | 11                          | Tonga                          | KT313643         |            |          |                            |
|                        |                      | 44                          | French Polynesia               | KT313644         |            |          |                            |
|                        | Haplotype II         | 29                          | New Caledonia                  | KT313645         |            |          |                            |
|                        |                      | 33                          | Fiji                           | KT313646         |            |          |                            |
|                        | Haplotype III        | 3                           | French Polynesia               | KT313647         |            |          |                            |
|                        |                      | 19                          | Tonga                          | KT313648         |            |          |                            |
|                        | Haplotype IV         | 37                          | French Polynesia               | KT313649         |            |          |                            |
|                        |                      | 49                          | New Caledonia                  | KT313650         |            |          |                            |
|                        | Haplotype V          | 24                          | Fiji                           | KT313651         |            |          |                            |
|                        | Haplotype VI         | 6                           | French Polynesia               | KT313652         |            |          |                            |
|                        | Haplotype VII        | 3                           | Fiji                           | KT313653         |            |          |                            |
|                        |                      |                             | Australia                      |                  |            | DQ026284 | Beebe, <i>et al</i> , 2005 |
|                        | <b>South-America</b> |                             | Bolivia 1, 2                   |                  |            | JQ926682 | Paupy, <i>et al</i> , 2012 |
|                        |                      | Bolivia 3                   |                                | JQ926683         |            |          |                            |
|                        |                      | Bolivia 4                   |                                | JQ926681         |            |          |                            |
|                        |                      | Bolivia 5                   |                                | JQ926676         |            |          |                            |
|                        |                      | Brazil 1, 2, 3, 4           |                                | JQ926703         |            |          |                            |
|                        | Venezuela 1, 2, 3    |                             | JQ926701                       |                  |            |          |                            |
| <b>Central America</b> |                      | Mexico 1, 2, 3              |                                | JQ926698         |            |          |                            |
|                        |                      | Mexico 4                    |                                | JQ926699         |            |          |                            |
| <b>Caribbean</b>       |                      | Martinique 1                |                                | JQ926696         |            |          |                            |
|                        |                      | Martinique 2, 3             |                                | JQ926697         |            |          |                            |
| <b>North-America</b>   |                      | USA 1, 2, 3, 4, 5           |                                | JQ926684         |            |          |                            |
| <b>South East Asia</b> |                      | Cambodia 1                  |                                | JQ926688         |            |          |                            |
|                        |                      | Cambodia 2                  |                                | JQ926689         |            |          |                            |
|                        |                      | Cambodia 3                  |                                | JQ926690         |            |          |                            |
|                        |                      | Thailand 1, 2               |                                | JQ926691         |            |          |                            |
|                        |                      | Thailand 3                  |                                | JQ926692         |            |          |                            |
|                        |                      | Vietnam 1, 2                |                                | JQ926685         |            |          |                            |
|                        |                      | Vietnam 3                   |                                | JQ926686         |            |          |                            |
|                        |                      | Vietnam 4                   |                                | JQ926687         |            |          |                            |
|                        | <b>Africa</b>        |                             | Republic of Côte d'Ivoire 1    |                  | JQ926693   |          |                            |
|                        |                      |                             | Republic of Côte d'Ivoire 2    |                  | JQ926694   |          |                            |
|                        |                      | Republic of Côte d'Ivoire 3 |                                | JQ926695         |            |          |                            |
|                        |                      | Tanzania 1, 2, 3, 4         |                                | JQ926704         |            |          |                            |
|                        | Cameroon 1, 2, 3     |                             | JQ926702                       |                  |            |          |                            |
|                        | Guinea 1, 2          |                             | JQ926700                       |                  |            |          |                            |
| <b>ND4</b>             |                      |                             |                                |                  |            |          |                            |
| <b>Pacific</b>         | Haplotype I          | 63                          | New Caledonia                  | KT313654         | This study |          |                            |
|                        |                      | 35                          | Fiji                           | KT313655         |            |          |                            |
|                        |                      | 11                          | Tonga                          | KT313656         |            |          |                            |
|                        | Haplotype II         | 51                          | French Polynesia               | KT313657         |            |          |                            |
|                        |                      | 2                           | Fiji                           | KT313658         |            |          |                            |
|                        | Haplotype III        | 19                          | Tonga                          | KT313659         |            |          |                            |
|                        |                      | 39                          | French Polynesia               | KT313660         |            |          |                            |
|                        |                      | 27                          | New Caledonia                  | KT313661         |            |          |                            |
|                        |                      |                             | 23                             | Fiji             |            | KT313662 |                            |
|                        | <b>South-America</b> |                             | Bolivia 1                      |                  |            | JQ926708 | Paupy, <i>et al</i> , 2012 |
|                        |                      | Bolivia 2, 3                |                                | JQ926707         |            |          |                            |
|                        |                      | Bolivia 4, 5                |                                | JQ926705         |            |          |                            |
|                        |                      | Brazil 1                    |                                | JQ926718         |            |          |                            |
|                        |                      | Brazil 2, 3, 4              |                                | JQ926719         |            |          |                            |
|                        | Venezuela            |                             | JQ926726                       |                  |            |          |                            |
| <b>Central America</b> |                      | Mexico 1, 2, 3              |                                | JQ926713         |            |          |                            |
|                        |                      | Mexico 4                    |                                | JQ926714         |            |          |                            |
| <b>Caribbean</b>       |                      | Martinique 1                |                                | JQ926711         |            |          |                            |
|                        |                      | Martinique 2, 3             |                                | JQ926712         |            |          |                            |
| <b>North-America</b>   |                      | USA 1, 2, 3, 4, 5           |                                | JQ926725         |            |          |                            |
| <b>South East Asia</b> |                      | Cambodia 1, 2, 3            |                                | JQ926722         |            |          |                            |
|                        |                      | Thailand 1, 2               |                                | JQ926720         |            |          |                            |
|                        |                      | Thailand 3                  |                                | JQ926721         |            |          |                            |
|                        |                      | Vietnam 1, 2                |                                | JQ926723         |            |          |                            |
|                        |                      | Vietnam 3, 4                |                                | JQ926724         |            |          |                            |
|                        | <b>Africa</b>        |                             | Republic of Côte d'Ivoire 1, 2 |                  | JQ926709   |          |                            |
|                        |                      |                             | Republic of Côte d'Ivoire 3    |                  | JQ926710   |          |                            |
|                        |                      | Tanzania 1, 2, 3, 4         |                                | JQ926715         |            |          |                            |
|                        |                      | Cameroon 1, 2, 3            |                                | JQ926716         |            |          |                            |
|                        | Guinea 1, 2          |                             | JQ926717                       |                  |            |          |                            |
